# Supplementary material for: Augmented Kalman filter with a reduced mechanical model to estimate tower loads on an onshore wind turbine: a digital twin concept
Source: Copernicus journal article supplement (doi:10.5194/wes-2020-55), 2020-03-13
Supplement: Supplementary file [file KalmanFilter-diff.pdf › ResponseToReviewers/KalmanFilter-diff.pdf]

# Augmented Kalman filter with a reduced mechanical model to estimate tower loads on an onshore wind turbine: a digital twin concept

Emmanuel Branlard<sup>1</sup>, Dylan Giardina<sup>1</sup>, and Cameron S. D. Brown<sup>2</sup>

<sup>1</sup>National Renewable Energy Laboratory, Golden, CO, USA

<sup>2</sup>Ørsted, Nesa Allé 1, 2820 Gentofte, Denmark

**Correspondence:** E. Branlard (emmanuel.branlard@nrel.gov)

**Abstract.** ~~The paper~~ This article presents an application of the Kalman filtering technique to estimate loads on a wind turbine. The approach combines a mechanical model and a set of measurements to estimate signals that are not available in the measurements, such as: wind speed, thrust, tower position, and tower loads. The model is several fold faster than real-time and is intended to be run online, for instance, to evaluate real-time fatigue life consumption of a field turbine using a digital twin, perform condition monitoring, or assess loads for dedicated control strategies. The mechanical model is built using a Rayleigh-Ritz approach and a set of joint coordinates. The ~~paper-article~~ presents a general method and illustrates it using a 2 degrees of freedom model of a wind turbine, and, using rotor speed, generator torque, pitch, and tower-top acceleration as measurement signals. The different components of the model are tested individually. The overall method is evaluated by computing the errors in estimated tower bottom equivalent moment from a set of simulations. From this preliminary study, it appears that the tower bottom equivalent moment is obtained with about 10% accuracy. The limitation of the model and the required steps forwards are discussed.

**DOF** degrees of freedom

**KF** Kalman filter

**FA** Fore-Aft

15 **TT** tower-top

**TB** Tower bottom

**SS** Side-side

## 1 Introduction

Wind turbines are designed and optimized for a given site or class definition using numerical tools, and, using a statistical assessments of the environmental conditions the turbine will experience. The uncertainty on the tools and data are accounted

20

for using multiplicative safety factors ~~-,which-that~~ are determined from a combination of experience and specifications by the standards. Overconservative safety factors will imply unnecessary costs ~~which-that~~ may be later on alleviated by ~~extended~~ ~~extending~~ the life time of a project. An under estimate of the safety factor will likely lead to catastrophic failures. Once a design is complete and the product is in place, is it possible to predict what the life time of the wind turbine will be?

25 Digital twins are becoming increasingly popular to follow the life cycle of a physical system. This concept is used to bridge the gap between the modelling and measurement realm: real time measurement from the physical system are communicated to a digital system and this information is combined with a numerical model to estimate the state of the system and potentially predict its evolution. A Kalman filter (KF) is an example of technique that can be used: it combines a model of a system with a set of measurements on this system to predict additional variables, such as positions or loads at points where no measurements  
30 are available. ~~Other approaches are for instance: inverse methods, or neural network methods~~In this study we focus on KF methods, but other load estimation techniques may be used, such as: lookup table Mendez Reyes et al. (2019), modal expansions Iliopoulos et al. (2016), machine learning Evans et al. (2018), neural-networks Schröder et al. (2018), polynomial chaos expansion Dimitrov et al. (2018), deconvolution Jacquelin et al. (2003), or load extrapolation Ziegler et al. (2017).

Kalman filters have been extensively used in control engineering with a wide range of applications. Auger et al. (2013) provide a review of some industrial applications. Load estimation using KF are found,e.g. in the following references Ma and Ho (2004); Eftekl  
35 . In the context of wind energy, wind speed estimation is critical for the determination of the dynamics of the system. This topic was for instance investigated using parametric models by Bozkurt et al. (2014), using Kalman filters by Østergaard et al. (2007), Knudsen et al. (2011), or Song et al. (2017), and using Luenberger type observer by Hafidi and Chauvin (2012). A comparison of wind speed estimation technique is found in ~~Soltani et al. (2013)~~.Soltani et al. (2013). The techniques were  
40 extended to also estimate the wind shear and turbine misalignments (see e.g. Bottasso et al. (2010), Simley and Pao (2016), Bertelè et al. (2018)). Kalman filtering has been used to estimate rotor loads and wind speed in application to rotor controls by Boukhezzar and Siguerdidjane (2011). Kalman filtering was recently used by Belloli (2019) to estimate the sea state based on the knowledge of the offshore platform position. More general approaches use Kalman filtering in combination with a model of the full wind turbine dynamics. These ~~approach~~ ~~approaches~~ were used for wind speed estimation and load alleviation via indi-  
45 vidual pitch control (Selvam et al. (2009), Bottasso and Croce (2009)), and for online estimation of mechanical loads Bossanyi (2003). An example of estimating tower loads with the acceleration sensor is for instance found in the report of Hau (2008). Bossanyi et al. compared the observed rotor and tower loads with measurements, and investigated the potential of the control method to reduce damage equivalent loads (Bossanyi et al., 2012).

The methodology presented in this article uses an augmented KF (Lourens et al. (2012)) to estimate loads on the wind turbine  
50 based on measurement signals commonly available in the nacelle. The method builds on the approach used by Bossanyi et al. and Lourens et al. The method of Lourens et al. is generalized. On the other hand, the expression of the mechanical system may be seen as simplified compared to the approach of Bossanyi et al.: a Rayleigh-Ritz formulation is used and the system is not further linearized. The equations are given in full for a 2 degrees of freedom system, and the source code is made available online. The time series of estimated loads are applied to assess the fatigue life consumption of the turbine components using  
55 the rainflow counting method. The study focuses on the determination of tower loads of onshore wind turbine. A scheme of the

method is provided in Figure 1. The numerical model of the wind turbine relies on a Rayleigh-Ritz shape-function approach

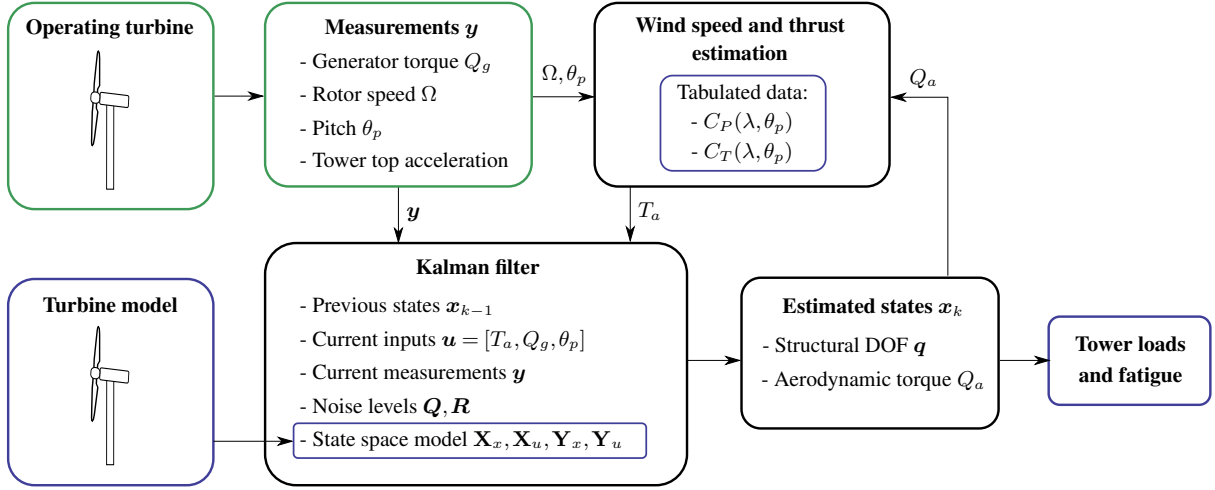

**Figure 1.** Main components of the model: wind turbine measurements and a turbine model are combined to estimate tower loads. A wind speed estimator and a Kalman filter algorithm are used in the estimation. Turbine model dependencies are framed in blue.

with reduced numbers of degrees of freedom (Branlard (2019a)). The wind speed is estimated using an approach similar to Østergaard et al. (2007), and the thrust force estimation is based on this wind speed estimate. The generator torque, the rotor speed, and the tower-top accelerations are used as measurements and combined with the numerical model ~~with~~ within an augmented KF. The time series of loads in the tower are determined based on the tower shape function and the tower degrees of freedom, and the fatigue loads are computed from this signal. It is noted that the method is expected to be more accurate at the tower-bottom than the tower-top because rotor asymmetric loading cannot be captured from the acceleration measurement.

The first part presents the different components required for this work: the augmented KF, the numerical model of the turbine, and the estimators for the wind speed, thrust, tower load, and fatigue. Simple illustrations and validation results for the different components of the model are provided in a second part. The third part presents full applications but limited to simulations. Discussions and conclusions follow.

## 2 Description of the models

### 2.1 Example for a 2DOF wind turbine model

We start this section by an illustrative example, before describing the different parts of the model in their general form. A wind turbine is here modelled using 2 DOF: 1) the generalized coordinate associated with the fore-aft (FA) bending of the tower,  $q_t$ ; 2) the shaft rotation,  $\psi$ . The tower bending is associated with a shape function  $\Phi_t(z)$ , such that the FA displacement of a point, at height  $z$ , and at time  $t$ , is given by  $u(z, t) = q_t(t)\Phi_t(z)$ . The shape function is normalized to unity at the tower-top, and  $q_t$  is

then equal to the FA displacement at the tower-top (see Figure 2). The equations of motion of the system are:

$$75 \quad \begin{bmatrix} M & 0 \\ 0 & J \end{bmatrix} \begin{bmatrix} \ddot{q}_t \\ \ddot{\psi} \end{bmatrix} + \begin{bmatrix} C & 0 \\ 0 & 0 \end{bmatrix} \begin{bmatrix} \dot{q}_t \\ \dot{\psi} \end{bmatrix} + \begin{bmatrix} K & 0 \\ 0 & 0 \end{bmatrix} \begin{bmatrix} q_t \\ \psi \end{bmatrix} = \begin{bmatrix} T_a^* \\ Q_a - Q_g \end{bmatrix} \quad (1)$$

where:  $M$ ,  $C$ ,  $K$  are the generalized mass, damping and stiffness associated with the FA DOF;  $J$  is the drivetrain inertia;  $T_a^*$  and  $Q_a$  are the aerodynamic thrust and torque; and  $Q_g$  is the generator torque. A star is used as upper-script of the thrust to indicate that using the thrust directly is a rough approximation. A more elaborate expression of the generalized force acting on  $q_t$  is given in Section 3.3. The determination of  $M$ ,  $C$  and  $K$  is discussed in Branlard (2019a). For the NREL-5MW turbine, 80 the values are:  $M = 4.4e^5$  kg,  $D = 2.5e^4$  kg/s,  $K = 2.7e^6$  kg/s<sup>2</sup> and  $J = 4.3e^7$  kg.m<sup>2</sup>. We tuned the damping term  $C$  to account for aerodynamic damping, as mentioned in Section 3.3. Aerodynamic stiffness is included in  $T_a^*$ . In this example, the system of equations is only coupled via the aerodynamic loads.

The following measurements are usually readily available on any commercial wind turbine: the generator power,  $P_g$ ; the blade pitch angle,  $\theta_p$ ; the rotor rotational speed,  $\Omega \triangleq \dot{\psi}$ . and the tower-top acceleration in the FA direction,  $\ddot{q}_t$ ; The knowledge 85 of the generator power, speed and losses allows ~~to estimate the~~ for the estimation of the generator torque  $Q_g$ . In this study, the generator torque is assumed known. We will use an augmented KF concept to combine these measurements with the mechanical model to estimate the state of the system. The KF algorithm requires linear state and output equations. The state vector is assumed to be  $\mathbf{x} = [q_t, \psi, \dot{q}_t, \dot{\psi}, Q_a]$ . The fact that some of the loads were included into the state vector is referred to as ~~state augmentation~~ “state augmentation”. The choice of loads to include in the state vector is not unique and will lead to 90 different state equations. Using this choice for  $\mathbf{x}$ , we write Equation 1 ~~is written~~ into the following state equation:

$$\begin{bmatrix} \dot{q}_t \\ \dot{\psi} \\ \ddot{q}_t \\ \ddot{\psi} \\ \dot{Q}_a \end{bmatrix} = \begin{bmatrix} 0 & 0 & 1 & 0 & 0 \\ 0 & 0 & 0 & 1 & 0 \\ -M^{-1}K & 0 & -M^{-1}C & 0 & 0 \\ 0 & 0 & 0 & 0 & J^{-1} \\ 0 & 0 & 0 & 0 & 0 \end{bmatrix} \begin{bmatrix} q_t \\ \psi \\ \dot{q}_t \\ \dot{\psi} \\ Q_a \end{bmatrix} + \begin{bmatrix} 0 & 0 & 0 \\ 0 & 0 & 0 \\ M^{-1} & 0 & 0 \\ 0 & -J^{-1} & 0 \\ 0 & 0 & 0 \end{bmatrix} \begin{bmatrix} T_a^*(\dot{\psi}, Q_a, \theta_p) \\ Q_g \\ \theta_p \end{bmatrix} \quad (2)$$

where for simplicity the time derivatives of the aerodynamic torque is assumed to be zero, an assumption referred to as “random walk” force model. This assumption accounts of saying that the estimate of the torque at the next time step is likely to be close to the one at the current time step. Improvements on this will be discussed in Section 5. The thrust is determined based on the 95 rotor speed, the aerodynamic torque, and the pitch angle, using tabulated data, as described in Section 2.4. The output equation relates the measurements to the states and inputs as follows:

$$\begin{bmatrix} \ddot{q}_t \\ \dot{\psi} \\ Q_g \\ \theta_p \end{bmatrix} = \begin{bmatrix} -M^{-1}K & 0 & -M^{-1}C & 0 & 0 \\ 0 & 0 & 0 & 1 & 0 \\ 0 & 0 & 0 & 0 & 0 \\ 0 & 0 & 0 & 0 & 0 \end{bmatrix} \mathbf{x} + \begin{bmatrix} M^{-1} & 0 & 0 \\ 0 & 0 & 0 \\ 0 & 1 & 0 \\ 0 & 0 & 1 \end{bmatrix} \begin{bmatrix} T_a^* \\ Q_g \\ \theta_p \end{bmatrix} \quad (3)$$

Equation 2 and Equation 3 are used within a KF algorithm to estimate the states vector based on the measurements. The estimated time series of  $q_t$ , together with its associated shape function  $\Phi_t$ , are used to determine the bending moments within

100 the tower and estimate tower fatigue loads, based on the method presented in Section 2.5. Results from this simple model will be provided in Section 3. The remaining paragraphs of this section generalize the approach presented.

## 2.2 Mechanical model of the wind turbine

The wind turbine is described using a set of degrees of freedom (DOF) that consist of joints coordinates and shape functions coordinates. The method was described in previous work (Branlard, 2019a), and the source code made available online, 105 via a library called YAMS (Branlard, 2019b). Similar approaches are for instance used in the elastic codes Flex and OpenFAST (OpenFAST, 2020). The advantage of the method is that the system can be described with few DOF. The number of DOF is between 2 and 30 DOF whereas traditional finite element methods require in the order of one thousand DOF.

The only joint coordinate retained in the current model is the shaft azimuthal position, noted  $\psi$ . The shaft torsion, and nacelle yaw and tilt joints can be added without difficulty. The tower and blades are represented using a set of shape functions taken as 110 the first mode shapes of these components. The shape functions of the tower are assumed to be the same in the FA and side side (SS) directions, ~~which~~-that are respectively aligned with the  $x$  and  $y$  directions (see Figure 2). The number of shape functions are noted  $n_{xt}$ ,  $n_{yt}$  and  $n_b$  for the tower FA, tower SS, and blade respectively. Writing  $B$  the number of blades,  $n_s$  the number of DOF representing the shaft, the total number of DOF is:  $n_q = n_s + Bn_b + n_{xt} + n_{yt}$ . The tower DOF are written  $q_{xt,i}$  with  $i \in [1..n_{xt}]$  and  $q_{yt,i}$  with  $i \in [1..n_{yt}]$ . Similar notations are used for the blade DOF.

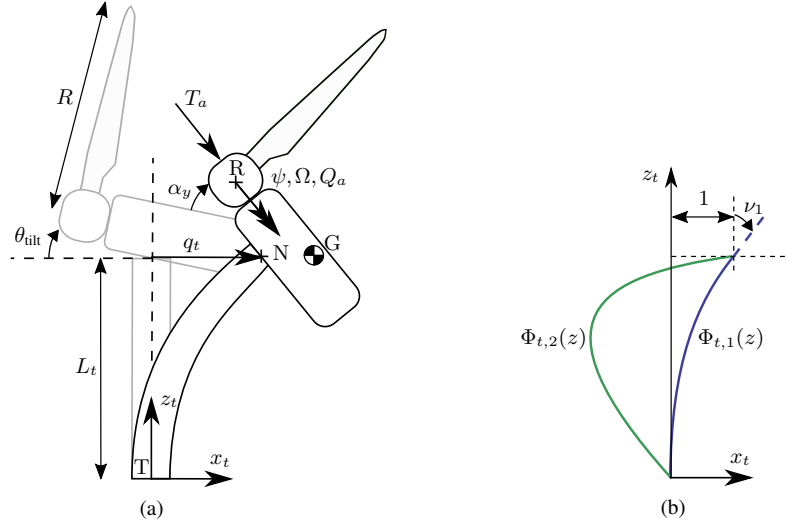

**Figure 2.** (a) Notations for the wind turbine model and (b) example of shape functions used for the tower. Definition of points: T, tower bottom; N, tower-top; G, center of mass of the rotor nacelle assembly; R, rotor center. The shape functions are normalized to unity at point N. The slope at the extremity of the first shape function is written  $\nu_1 \triangleq \frac{d\Phi_{t,1}}{dz}(L_t)$ .

115 The equation of motions are established using Lagrange's equation. The example presented in Section 2.1 corresponds to  $n_s = 1$ ,  $n_b = 0$ ,  $n_{t,SS} = 0$  and  $n_{t,FA} = 1$ . An example for a 5DOF system, with  $n_s = 1$ ,  $B = 2$ ,  $n_b = 1$ ,  $n_{t,SS} = 0$  and  $n_{t,FA} = 1$ ,

is given in Branlard (2019a). In the general case, the equation of motions are described as:

$$M\ddot{\mathbf{q}} + C\dot{\mathbf{q}} + K\mathbf{q} = \mathbf{f} \quad \rightarrow \quad \begin{bmatrix} \dot{\mathbf{q}} \\ \ddot{\mathbf{q}} \end{bmatrix} = \begin{bmatrix} \mathbf{0} & \mathbf{I} \\ -M^{-1}K & -M^{-1}C \end{bmatrix} \begin{bmatrix} \mathbf{q} \\ \dot{\mathbf{q}} \end{bmatrix} + \begin{bmatrix} \mathbf{0} \\ M^{-1}\mathbf{f} \end{bmatrix} \quad (4)$$

where  $M$ ,  $C$ ,  $K$  are the mass, damping, and stiffness matrices;  $\mathbf{q}$  is the vector of DOF; and  $\mathbf{f}$  is the vector of generalized loads acting on the DOF. An inconvenience of the method is that the mass matrix is a ~~non-linear~~ nonlinear function of the DOF. The main assumption of this work is that the ~~non-linearities~~ nonlinearities can be discarded as a first approximation. This assumption is further discussed in Section 5.

### 2.3 Augmented Kalman filter applied to a mechanical system

A description of the standard KF can be found e.g. in the textbook of Grewal and Andrews (2014) or Zarchan and Musoff (2015). The algorithm will not be detailed in this ~~paper~~article. The method expect a state and output equations of the following form:

$$\dot{\mathbf{x}} = \mathbf{X}_x \mathbf{x} + \mathbf{X}_u \mathbf{u} + \mathbf{w}_x \quad (\text{state equation}) \quad (5)$$

$$\mathbf{y} = \mathbf{Y}_x \mathbf{x} + \mathbf{Y}_u \mathbf{u} + \mathbf{w}_y \quad (\text{output/measurement equation}) \quad (6)$$

where  $\mathbf{x}$ ,  $\mathbf{u}$  and  $\mathbf{y}$  are the state, input, and measurement vectors ;  $\mathbf{X}_x$ ,  ~~$\mathbf{X}_y$~~  $\mathbf{X}_u$ ,  $\mathbf{Y}_x$  and  $\mathbf{Y}_u$  are Jacobian matrices describing the expected relationships between measurements, states and inputs ; and  $\mathbf{w}_x$  and  $\mathbf{w}_y$  are Gaussian uncorrelated noises associated with the state-space model and measurements respectively, of which the associated covariance matrices are noted  $\mathbf{Q} = E[\mathbf{w}_x \mathbf{w}_x^t]$  and  $\mathbf{R} = E[\mathbf{w}_y \mathbf{w}_y^t]$ , with  $E[\mathbf{w}_x \mathbf{w}_y^t] = 0$  ~~and~~,  $E$  the expected value operator, and the subscript  $t$  representing a transpose. We will develop these equations in the case of a mechanical system that follows the general form of Equation 4. Specific applications will be given in Section 3 and Section 4.

Different approaches can be used to write Equation 4 in the form of Equation 5, depending how the force vector is to be treated. In a first approach, the forces can be considered to be inputs  $\mathbf{f} = \mathbf{u}$ , in which case Equation 4 is directly in the form of Equation 5, with  $\mathbf{x} = [\mathbf{q}, \dot{\mathbf{q}}]$ . This implies that we have full knowledge of the forces acting on the system at every time step, which is unlikely. In a second approach, the forces can be assumed to be part of the system noise,  $\mathbf{w}_x$ , which would lead to  $\mathbf{x} = [\mathbf{q}, \dot{\mathbf{q}}]$ , and  $\mathbf{B} = 0$ . This is obviously a crude approximation ~~since~~because the forces acting on the system are ~~non~~ stochastic ~~nonstochastic~~, and, we likely have some knowledge on them. In the intermediate approach introduced by Lourens et al. (Lourens et al., 2012), some of the forces are included in the system noise, and others as part of the states. ~~The~~ We write the reduced set of loads that are part of the ~~states is written~~ state  $\mathbf{p}$ , of length  $n_p$ , and the full force vector is assumed to be approximated by:  $\mathbf{f} \approx \mathbf{S}_p \mathbf{p}$ , where  $\mathbf{S}_p$  is a matrix of dimension  $n_q \times n_p$ . The reduced set of forces,  $\mathbf{p}$ , is integrated into the state vector as:  $\mathbf{x} = [\mathbf{q}, \dot{\mathbf{q}}, \mathbf{p}]$ . This process is referred to as ~~state-augmentation~~“state augmentation”.

We introduce a generalized approach and assume that the forces are a combination of states, inputs and unknown noise:

$$\mathbf{f} \approx \mathbf{F}_q \mathbf{q} + \mathbf{F}_{\dot{q}} \dot{\mathbf{q}} + \mathbf{F}_p \mathbf{p} + \mathbf{F}_u \mathbf{u} + \mathbf{w}_f \approx \mathbf{F}_q \mathbf{q} + \mathbf{F}_{\dot{q}} \dot{\mathbf{q}} + \mathbf{F}_p \mathbf{p} + \mathbf{F}_u \mathbf{u} \quad (7)$$

where the  $\mathbf{F}_\bullet$  matrix represent the Jacobian of the force vector with respect to vector  $\bullet$ , and  $\mathbf{w}_f$  are unknown forces that are assumed to be part of system disturbance  $\mathbf{w}_x$ . The terms  $\mathbf{F}_q$  and  $\mathbf{F}_{\dot{q}}$  are linearized stiffness and damping terms. These terms are zero if their contributions are already included in the definitions of  $\mathbf{K}$  and  $\mathbf{C}$ . In practice, the linearization of the force vector may not be possible, and assumed relationships or engineering models are used. As an example, if  $\mathbf{p}$  contain the thrust force and  $\mathbf{f}$  the moment at the tower base, the appropriate element of  $\mathbf{F}_p$  could be set with the lever arm between tower-top and tower base.

This approach allows us to use the knowledge we have of some of the main loads acting on the system and express their dynamics into the state-space equation. The forces may for instance be assumed to follow a first order system as follows:

$$\dot{\mathbf{p}} = \mathbf{P}_q \mathbf{q} + \mathbf{P}_{\dot{q}} \dot{\mathbf{q}} + \mathbf{P}_p \mathbf{p} + \mathbf{P}_u \mathbf{u} \quad (8)$$

where the  $\mathbf{P}_\bullet$  matrices are obtained from a knowledge of the force evolution. Second order system could also be introduced, in which case the state needs to be augmented with both  $\mathbf{p}$  and  $\dot{\mathbf{p}}$  ("random walk" force model). For simplicity, the applications used in this work will assume  $\dot{\mathbf{p}} = \mathbf{0}$ , but future work will investigate the benefit of using first order systems for the evolution of the forces.

Inserting Equation 7 into Equation 4, introducing  $\mathbf{x} = [\mathbf{q}, \dot{\mathbf{q}}, \mathbf{p}]$ , and using Equation 8, a state equation of the form of Equation 5 is obtained:

$$\mathbf{X}_x = \begin{bmatrix} \mathbf{0} & \mathbf{I} & \mathbf{0} \\ -\mathbf{M}^{-1}(\mathbf{K} - \mathbf{F}_q) & -\mathbf{M}^{-1}(\mathbf{C} - \mathbf{F}_{\dot{q}}) & \mathbf{M}^{-1}\mathbf{F}_p \\ \mathbf{P}_{\dot{q}} & \mathbf{P}_q & \mathbf{P}_p \end{bmatrix}, \quad \mathbf{X}_u = \begin{bmatrix} \mathbf{0} \\ \mathbf{M}^{-1}\mathbf{F}_u \\ \mathbf{P}_u \end{bmatrix} \quad (9)$$

The measurements are assumed to be a combination of the acceleration, velocity, displacements, loads and inputs:

$$\mathbf{y} \approx \tilde{\mathbf{Y}}_{\ddot{q}} \ddot{\mathbf{q}} + \tilde{\mathbf{Y}}_{\dot{q}} \dot{\mathbf{q}} + \tilde{\mathbf{Y}}_q \mathbf{q} + \tilde{\mathbf{Y}}_p \mathbf{p} + \tilde{\mathbf{Y}}_u \mathbf{u} \quad (10)$$

~~Inserting~~ The matrix  $\tilde{\mathbf{Y}}_{\ddot{q}}$  is here introduced for convenience when a simple relationship exists between outputs and DOF accelerations, but this term can be omitted altogether and should not be double counted. Indeed, the acceleration  $\ddot{\mathbf{q}}$  can be isolated from Equation 4 ~~into an output~~, and then expressed as a function of  $\dot{\mathbf{q}}$ ,  $\mathbf{p}$  and  $\mathbf{u}$ . If an automated linearization procedure is used, then the acceleration term should be skipped because it would otherwise be redundant. The output relationship would then be:

$$\mathbf{y} \approx \mathbf{Y}_{\dot{q}} \dot{\mathbf{q}} + \mathbf{Y}_q \mathbf{q} + \mathbf{Y}_p \mathbf{p} + \mathbf{Y}_u \mathbf{u} \quad (11)$$

The link between the two formulations is provided using Equation 4, giving:

$$\mathbf{Y}_q = \tilde{\mathbf{Y}}_q - \tilde{\mathbf{Y}}_{\ddot{q}} \mathbf{M}^{-1} \mathbf{K}, \quad \mathbf{Y}_{\dot{q}} = \tilde{\mathbf{Y}}_{\dot{q}} - \tilde{\mathbf{Y}}_{\ddot{q}} \mathbf{M}^{-1} \mathbf{C}, \quad \mathbf{Y}_p = \tilde{\mathbf{Y}}_p + \tilde{\mathbf{Y}}_{\ddot{q}} \mathbf{M}^{-1} \mathbf{F}_p, \quad \mathbf{Y}_u = \tilde{\mathbf{Y}}_u + \tilde{\mathbf{Y}}_{\ddot{q}} \mathbf{M}^{-1} \mathbf{F}_u \quad (12)$$

An output equation of the form of Equation 6 is ~~obtained, with:~~ directly obtained, as:

$$\mathbf{Y}_x = \begin{bmatrix} \mathbf{Y}_q & \mathbf{Y}_{\dot{q}} & \mathbf{Y}_p \end{bmatrix}, \quad \mathbf{Y}_u = \underline{\mathbf{u}} + \mathbf{Y}_{\ddot{q}}^{-1} \underline{\mathbf{u}} \quad (13)$$

175 Equation 9 and Equation 13 form the bridge between the definition of the mechanical model and the state and output equations needed by the KF algorithm.

Equation 5 and Equation 6 are in continuous form, whereas the KF algorithm uses discrete forms. The discrete form of the matrices perform the time integration of the states from one time step to the next, namely:  $\mathbf{x}_{k+1} = \mathbf{X}_{x,d} \mathbf{x}_k + \mathbf{X}_{u,d} \mathbf{u}_k$ , where the subscript  $d$  indicates the discrete form of the matrices and  $k$  is the time step index. The matrix  $\mathbf{X}_{x,d}$  is referred to as the ~~fundamental matrix~~ “fundamental matrix”. For time-invariant systems, this matrix may be obtained using Laplace ~~transform~~ or by Taylor-series expansion (Zarchan and Musoff, 2015). For a given time step  $\Delta t$ , the discrete matrices corresponding to  $\mathbf{X}_x$  and  $\mathbf{X}_u$  are:

$$\begin{aligned} \mathbf{X}_{x,d} &= e^{\mathbf{X}_x \Delta t} = \mathbf{I} + \mathbf{X}_x \Delta t + \frac{(\mathbf{X}_x \Delta t)^2}{2!} + \dots \approx \mathbf{I} + \mathbf{X}_x \Delta t \\ \mathbf{X}_{u,d} &= \int_0^{\Delta t} \mathbf{X}_{x,d}(\tau) \mathbf{X}_u d\tau \approx [\mathbf{X}_{x,d} - \mathbf{I}] \mathbf{X}_x^{-1} \mathbf{X}_u \approx \mathbf{X}_u \Delta t \end{aligned} \quad (14)$$

185 The approximation in Equation 14 is effectively a first order forward Euler time integration. The matrix  $\mathbf{Y}_x$  and  $\mathbf{Y}_u$  remain unchanged by the discretization ~~since the output~~ because the output equation is an algebraic equation involving quantities at the same time step.

Many choices are possible as to how the model may be formulated: which forces should be accounted for in the reduced set  $\mathbf{p}$ , which forces should be assumed to be obtained from the inputs, which models to use for the  $\mathbf{P}$  matrices, etc. ~~Since the~~ The study is limited to onshore wind turbines, ~~thereby~~ the main loads are the aerodynamic thrust and torque. A subtlety to account for, is that some of the forces of the model presented in Equation 4 are generalized forces, ~~which and~~ are projection of loads onto the shape functions (Branlard, 2019a). An example will be given in Section 3.3.

The Jacobian matrices introduced should be determined by linearization about an operating point. The mass matrix should also be linearized about such point. In the current work, the ~~non-linearities~~ nonlinearities are either neglected, or directly inserted into the expression presented without performing a linearization. This crude simplification will be discussed in Section 5, in light of the results presented in Section 3 and Section 4.

## 2.4 Wind speed and thrust estimation

~~In this paragraph~~ In this section,  $Q_a$ ,  $\theta_p$  and  $\Omega$  are assumed to be given. The aerodynamic power and thrust coefficients,  $C_P$  and  $C_T$ , are also assumed to be known as function of the pitch angle and ~~tip speed~~ tip-speed ratio,  $\lambda = \Omega R / U_0$ , where  $R$  is the rotor radius and  $U_0$  the wind speed. The functions  $C_P(\lambda, \theta_p)$  and  $C_T(\lambda, \theta_p)$  are estimated by running a parametric set of simulations at constant operating conditions. Some uncertainty is here present as to whether the real turbine does ~~performs~~ perform as predicted by these functions. This question will be considered in Section 5. The aerodynamic torque is computed from the tabulated data as:

$$Q_{a,\text{tab}}(U_0, \Omega, \theta_p) = \frac{1}{2} \rho \pi R^2 \frac{U_0^3}{\Omega} C_P \left( \frac{\Omega R}{U_0}, \theta_p \right) \quad (15)$$



205 ~~The wind speed is obtained by solving the following non-linear constraint equation for  $u_{\text{est}}$ :~~

$$\text{Find } u_{\text{est}}, \text{ such that } Q_a - Q_{a,\text{tab}}(u_{\text{est}}, \Omega, \theta_p) = 0$$

where  $\rho$  is the air density, which is another potential source of uncertainty to be considered when dealing with measurements. The wind speed is obtained by solving the following nonlinear constraint equation for  $u_{\text{est}}$ :

$$\text{Find } u_{\text{est}}, \text{ such that } Q_a - Q_{a,\text{tab}}(u_{\text{est}}, \Omega, \theta_p) = 0 \quad (16)$$

210 The wind speed determined by this method is assumed to be the effective wind speed acting over the rotor area. A correction for nacelle displacements is discussed in Section 5. The aerodynamic thrust is estimated from this wind speed as:

$$T_{a,\text{est}} = T_{a,\text{tab}}(u_{\text{est}}, \Omega, \theta_p), \quad \text{with} \quad T_{a,\text{tab}}(U_0, \Omega, \theta_p) = \frac{1}{2} \rho \pi R^2 U_0^2 C_T \left( \frac{\Omega R}{U_0}, \theta_p \right) \quad (17)$$

## 2.5 Tower loads and fatigue estimation

The deflection of the tower,  $U$ , in the  $x$  or  $y$  directions, at a given height  $z$ , and a given time  $t$ , is given by the sum of the tower  
215 shape functions scaled by the tower degrees of freedom:

$$U_x(z, t) = \sum_i q_{xt,i}(t) \Phi_{t,i}(z), \quad U_y(z, t) = \sum_i q_{yt,i}(t) \Phi_{t,i}(z) \quad (18)$$

The curvature,  $\kappa$ , is obtained by differentiating the deflection twice, giving:

$$\kappa_x(z, t) = \sum_i q_{xt,i}(t) \frac{d^2 \Phi_{t,i}}{dz^2}(z), \quad \kappa_y(z, t) = \sum_i q_{yt,i}(t) \frac{d^2 \Phi_{t,i}}{dz^2}(z) \quad (19)$$

The bending moments along the tower heights-height are then obtained from the curvatures using Euler beam theory:

$$220 \quad M_y(z, t) = EI(z) \kappa_x(z, t), \quad M_x(z, t) = EI(z) \kappa_y(z, t) \quad (20)$$

where  $EI$  is the bending stiffness of a given tower cross section. The time series of bending moment are processed using a rain flow counting algorithm to estimate the equivalent loads and damage (International Standard IEC, Workgroup 3, 2005).

## 3 Simple applications and validations

### 3.1 Wind speed estimation

225 ~~The-In this section we illustrate and evaluate the~~ wind speed estimation methodology presented in Section 2.4~~is illustrated and evaluated in this section. Tabulated-. We computed tabulated~~  $C_P$  and  $C_T$  ~~values were obtained~~ for the NREL-5MW turbine (Jonkman et al., 2009) using the multi-physics simulation tool OpenFAST (OpenFAST, 2020). ~~A turbulent simulation was devised~~ We devised a turbulent simulation such as to sweep through the main operating regions of the wind turbine within a 10-min period, namely: the startup region (region 0), the optimal  $C_p$  tracking region (region 1), rotor-speed regulation (region

230 2), and power regulation (region 3). For the NREL-5MW turbine region Region 2 has a small span and it is here for the NREL-5MW turbine, it is thereby gathered with region 3. The turbine was simulated. We simulated the turbine with all the DOFs turned on. The following variables were extracted and extracted the following variables from the simulation at 50Hz:  $\bar{u}_{\text{ref}}$ , the average wind speed at the rotor plane;  $Q_{a,\text{ref}}$ , the aerodynamic torque;  $T_{a,\text{ref}}$  the aerodynamic thrust;  $\Omega_{\text{ref}}$  the rotational speed; and  $\theta_{p,\text{ref}}$  the pitch angle. The wind speed,  $u_{\text{est}}$ , was estimated using the method presented in Section 2.4. The results are presented in Figure 3 and commented below.

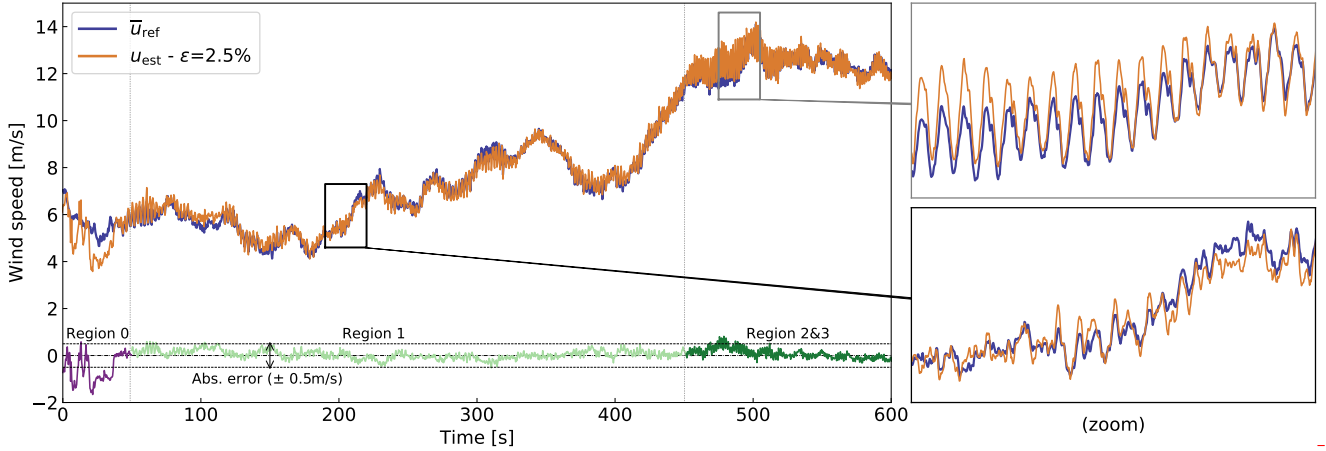

**Figure 3.** Wind speed estimation-based on compared to rotor-averaged wind speed for a reference simulation. (Left:) Wind speed time series and absolute error colored by operating regions. Two extracted windows are shown. (Right:) Relative error in estimated torque and wind speed colored by operating regions. The probability density function (PDF) is given for each axis.

235

The absolute error in wind speed is observed to be mostly within  $\pm 0.5 \text{ m/s}$ , both values being indicated by two dashed lines on the left figure. The error is greatest in region 0 where the generator torque is not yet applied. A separate wind speed method should be devised for this case. The mean relative error for the entire time series is  $\epsilon = 2.5\%$ . The estimated wind speed is seen observed to follow the challenging trends of this time series, matching both the low and high frequencies. In the top zoom, it is seen that no phase lag is observed in the estimated wind speed, but the estimated value is seen to overshoot.

240

There are several potential sources of errors in the current methodology. One concern is whether the unsteady aerodynamic torque, can be determined using a look-up table that uses instantaneous values, overshooting. The relative error between the unsteady torque  $Q_{a,\text{ref}}$  and the tabulated torque,  $Q_{a,\text{tab}}(\bar{u}_{\text{ref}}, \Omega_{\text{ref}}, \theta_{p,\text{ref}})$ , is used as the  $x$ -axis on the right of. A wide range of values is obtained, with the error varying between  $-40\%$  and  $20\%$ . Such estimation of the torque is likely to be accurate only for slow varying wind fields, where the effects of dynamic wake and dynamic stall on the blade loading will be limited. The tabulated method may be improved by accounting for these unsteady aerodynamic effects (discussed in ). Another question is whether the effective wind speed, that characterizes the aerodynamic forces on the turbine, is indeed the average wind speed at the rotor plane. The relative error between  $\bar{u}_{\text{ref}}$  and  $u_{\text{est}}$  is used as  $y$ -axis on the right figure. A large error on this axis may not necessarily indicate. Overall, the results from the test case are encouraging. It is not expected that the estimated wind speed

245

is wrong, since indeed this estimated wind speed is such that  $Q_a = Q_{a,tab}(u_{est}, \Omega_{ref}, \theta_{p,ref})$ , as a result of the minimization involved in . The estimated wind speed may thus be expected to be different from the rotor averaged ~~corresponds exactly to~~ the rotor-averaged wind speed. During the startup period, the error in wind speed can be large and is uncorrelated to the error in torque, yet a stronger correlation is seen when the turbine is producing power. Looking at the probability density functions given in the right of , it is seen that the errors in torque and wind speed are centered on zero. The fact that both errors are centered on zero, indicate that when the unsteady torque can indeed be obtained using instantaneous values and tabulated data, the (estimated) effective wind speed is close to the average wind speed at the rotor . Other sources of errors are discussed in .

A more thorough study on the questions raised above are left open for future work. Overall, the results from the test case are encouraging. Instead, it is a proxy to assess the instantaneous aerodynamic rotor state. Wind speed estimation is a standard feature of most wind turbine controllers, and it is likely that more advanced features are implemented by manufacturers. Any improvement on the methodology ~~used in the current paper will~~ would be beneficial for the procedure of loads estimation presented in this work.

### 3.2 Thrust estimation

The wind speed estimated in is used to estimate the thrust. The estimated thrust,  $T_{a,est}$ , is computed with Equation 17 and the wind speed estimated in Section 3.1. In Figure 4, the estimated thrust value is compared to the unsteady aerodynamic thrust from the simulation,  $T_{a,ref}$ . The values of  $T_{a,tab}(\bar{u}_{ref}, \Omega_{ref}, \theta_{p,ref})$  are also shown in the figure. For this simulation, the thrust

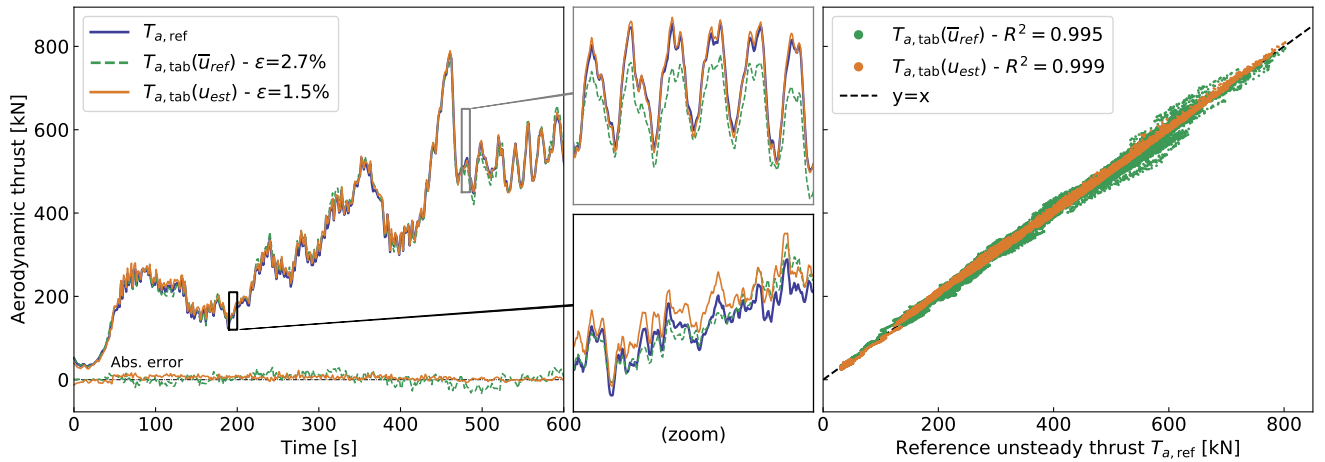

**Figure 4.** Comparison of aerodynamic thrusts:  $T_{a,ref}$ , obtained from a reference simulation;  $T_{a,tab}(\bar{u}_{ref})$ , obtained from tabulated  $C_T$  and the rotor averaged wind speed from the simulation;  $T_{a,est} = T_{a,tab}(u_{est})$ , obtained from the estimated wind speed. (Left:) Time series of thrust and absolute errors compared to the  $T_{a,ref}$ . (Right:) Scatter plot of the tabulated thrust compared to the reference thrust.

signal was obtained with a mean relative error of 1.5% over the range of operating conditions considered. Using The use of the estimated wind speed is seen to produce thrust values closer to the reference thrust than if  $\bar{u}_{ref}$  is used. In line with the discussions of Section 3.1, this could support the fact that the estimated wind speed provides an effective velocity, consistent

with the instantaneous state of the rotor, but different from the ~~rotor-averaged~~ wind speed. Yet, it is also possible  
 270 that compensating errors are at play, or, that the thrust is less sensitive to changes of wind speed or drive-train dynamics than the torque. Despite these open questions, we continue by assuming ~~the method provide that the method provides~~ thrust estimates with sufficient accuracy.

### 3.3 Reduced model of the mechanical system

The 2-DOF mechanical model presented in Section 2.1 is here compared to the more advanced OpenFAST model consisting of  
 275 16 DOF. As mentioned in Section 2.1, the generalized force acting on  $q_t$  can be further improved. The notations from Figure 2 are adopted. The resulting force and moment at the tower-top are written  $\mathcal{F}_N$  and  $\mathcal{M}_N$ . The contribution of this load to the generalized force is  $f_N = B_N \cdot [F_N; \mathcal{M}_N]$  where, according to the virtual work principle,  $B_N$  is the velocity transformation matrix that provides the velocity of point  $N$  as function of other DOFs. More details on this formalism are provided in Branlard (2019a). For the single tower DOF considered, the  $B$ -matrix consists of the end values of the shape function deflection and  
 280 slope, i.e.  $B_N = [\Phi_{t,1}(L_t), 0, 0, 0, \nu_1, 0]$ , where  $L_t$  is the length of the tower and  $\nu_1 \triangleq \frac{d\Phi_{t,1}}{dz}(L_t)$ . The shape functions are assumed to be normalized at their extremity, i.e.  $\Phi_{t,i}(L_t) = 1$ , so that the generalized force is:

$$f_N = \mathcal{F}_{x,N} + \nu_1 \mathcal{M}_{y,N} \quad (21)$$

The main forces acting at the tower-top are assumed to ~~the-be-be the~~ aerodynamic thrust and the gravitational force from the rotor nacelle assembly (RNA) mass,  $M_{\text{RNA}}$ . The loads are then obtained as:

$$285 \quad \mathcal{F}_{x,N} = T_a \cos(\alpha_y + \theta_{\text{tilt}}), \quad \mathcal{M}_{y,E} = T_a [x_{NR} \sin \theta_{\text{tilt}} + z_{NR} \cos \theta_{\text{tilt}}] + g M_{\text{RNA}} [x_{NG} \cos \alpha_y + z_{NG} \sin \alpha_y] \quad (22)$$

where, ~~using~~ Figure 2:  $\theta_{\text{tilt}}$  is the tilt angle of the nacelle;  $NR$  is the vector from the tower-top to the rotor center, where the thrust is assumed to act;  $NG$  is the vector from the tower-top to the RNA center of mass;  $g$  is the acceleration of gravity; and  $\alpha_y$  is the  $y$ -rotation of the tower-top due to the bending of the tower~~(see-)~~. For a single tower mode  $\alpha_y(t) = q_t(t)\nu_1$ . The linearization of Equation 21 and Equation 22 for small values of  $q_t$  leads to:

$$290 \quad f_N = q_t \{ -T_a \nu_1 \sin \theta_{\text{tilt}} + \nu_1^2 g M_{\text{RNA}} z_{NG} \} + (T_a \cos \theta_{\text{tilt}}) + T_a \nu_1 [x_{NR} \sin \theta_{\text{tilt}} + z_{NR} \cos \theta_{\text{tilt}}] + \nu_1 g M_{\text{RNA}} z_{NG} \quad (23)$$

where: the term in parenthesis is the main contribution, which justifies the use of  $T_a$  in Equation 1; the term in curly brackets  
~~is-seen-to-act-acts~~ as a stiffness term. The presence of  $T_a$  in this term introduce an undesired coupling and this term is kept  
 on the right-hand-side of Equation 1. It is noted that the vertical force  $\mathcal{F}_{z,N}$  contributes to the softening of the tower. The  
 main softening effect attributed to the RNA mass is included in the stiffness matrix, as described in Branlard (2019a). The  
 295 contribution of the thrust to the softening, and additional contribution of quadratic velocity forces to the generalized force are neglected.

The other elements of the 2D model are obtained from the OpenFAST input files. The mass, stiffness and damping matrix of Equation 1 are obtained using the YAMS library (Branlard, 2019a) which can take as input an OpenFAST model, and thus use the same shape functions. ~~The-Velocity~~ transformation matrices are used to convert individual component matrices (e.g.

300 blades, nacelle) into the global system matrices. The mass matrix thereby comprises the inertia terms from the tower and RNA. The damping of the 2 DOF model was tuned based on simple “decay” simulations, to include the aerodynamic damping contribution. The simulation used for validation consists of a linear ramp of wind speed from 0 to 10 m/s in the first 100 s, and a sudden drop to 6 m/s at 200 s. The aerodynamic loads, and the generator torque are extracted from the OpenFAST simulation and applied as external forces to the reduced-order model. Time series of tower-top positions, rotational speed and tower bottom moments are compared in Figure 5. The rotational speed is well captured, indicating that

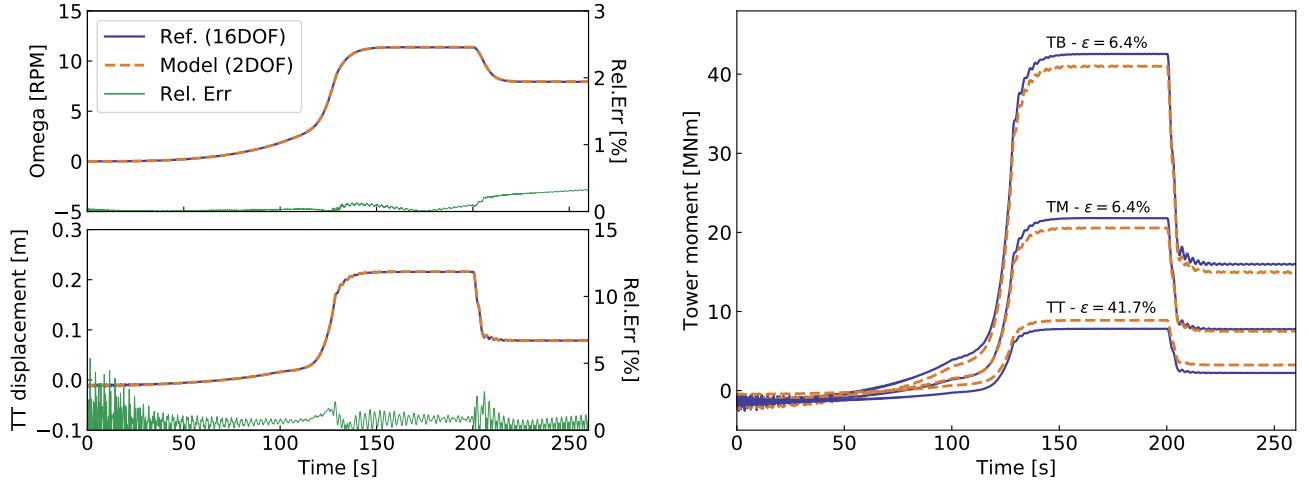

**Figure 5.** Simulation results using OpenFAST (16 DOF) and the reduced 2-DOF model. (Left): Rotational speed and tower-top (TT) displacements. (Right): Tower moments at three different heights: tower bottom (TB), tower middle (TM), and tower-top (TT). The TB moment is taken at 5% height above the ground and not exactly at the ground.

305 the rotational inertia is properly set, but also indicating that the drive-train torsion does not have a strong impact for this simulation. The overall trend of the tower-top displacements is also well captured, though more differences are present due to missing contributions from additional blade and tower DOFs, missing non-linearities and quadratic velocity forces.

310 The method from Section 2.5 is used to estimate the bending moments along the tower from the tower-top displacement. The results shown on the right of Figure 5 indicate that the overall trends and load levels are well estimated, but some offsets are observed, which are function of height. A contribution to the moment may be missing in the current model. This will be taken into consideration when analysing the results from the KF analysis.

#### 4 Application to wind turbine tower loads estimation

315 Some of the individual models presented in Section 2 were briefly validated in Section 3. The augmented KF described in Section 2.3 is now used, combining the different models together with the measurements. The state and output equations given in Equation 2 and Equation 3 are implemented. The state equation is discretized according to Equation 14 and provided to the

KF algorithm. Results from the KF simulation, which combines a set of measurements with a model, will be referred to as “KF estimation”. The values used for the covariance matrices,  $P$  and  $Q$  and  $R$ , are discussed in Section 5.

#### 4.1 Ideal cases without noise

The same simulation as the one presented in Section 3.1 is used, which extends from region 0 to region 3. The measurements sampled at 20 Hz are here directly taken from the OpenFAST simulation and not from a field experiment. This is obviously an ideal situation since no noise is present in the measurements. Further, the OpenFAST and KF models are based on the same parameters such as the mass and stiffness distribution. States and tower loads estimated using the KF model are compared with the simulation results in Figure 6. The signals are seen-observed to be well estimated by the KF model over the entire

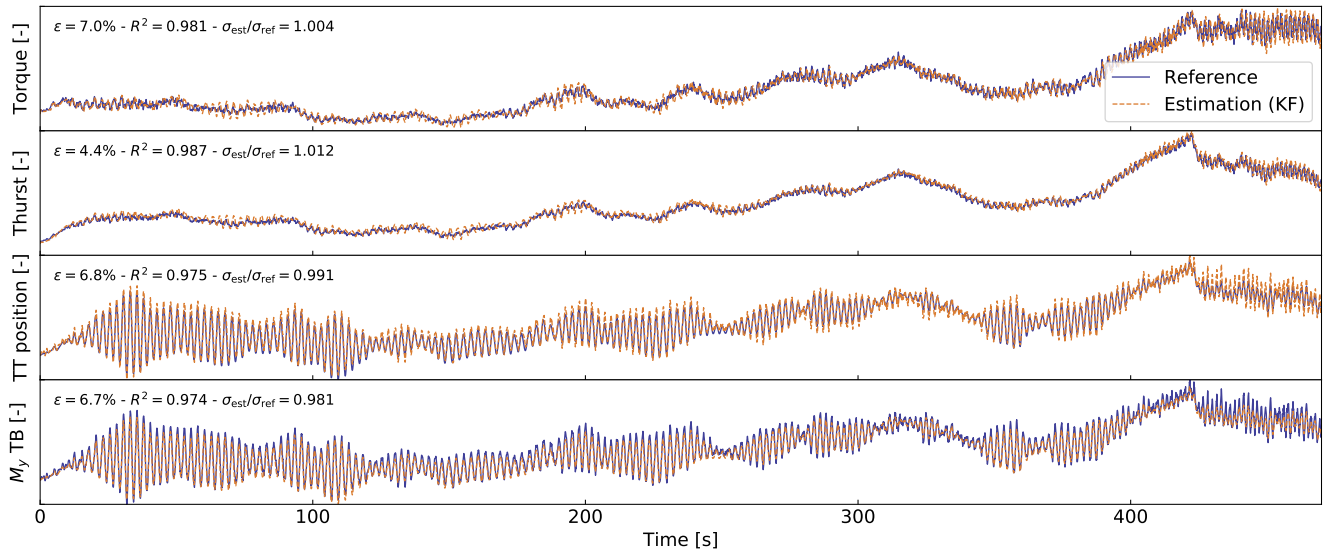

**Figure 6.** Comparison of signals simulated by OpenFAST (reference) compared with the ones estimated with the KF model. From top to bottom, dimensionless time series of: aerodynamic torque, aerodynamic thrust, tower-top displacement, Fore-Aft tower bottom moment.

range of operating regions. The error observed for the tower bottom moment is in the range of errors observed for the isolated mechanical system (Section 3.3).

A turbulent simulation is run, at an average wind speed of 14 m/s with turbulence intensity of 0.14, to illustrate the differences in the power spectral density of the signals. The results are given in Figure 7 and commented further. Frequencies that are not in the mechanical system (e.g. the second FA mode and the DT torsion) are still “captured” by the estimator via the measurements. The rotational speed is directly observable by the KF, so the signal is obviously well estimated. The thrust, is estimated based on the rotational speed and thus exhibits similar frequencies as the rotational speed, which is not the case for the reference thrust signal. The integration of the acceleration into the TT position ( $q_t$ ) shows a higher frequency content than the reference signal. The second FA frequency has a strong energy content in the estimated  $q_t$  signal. This frequency content comes from the acceleration signal, but it is not sufficiently captured and damped by the model which does not represent the

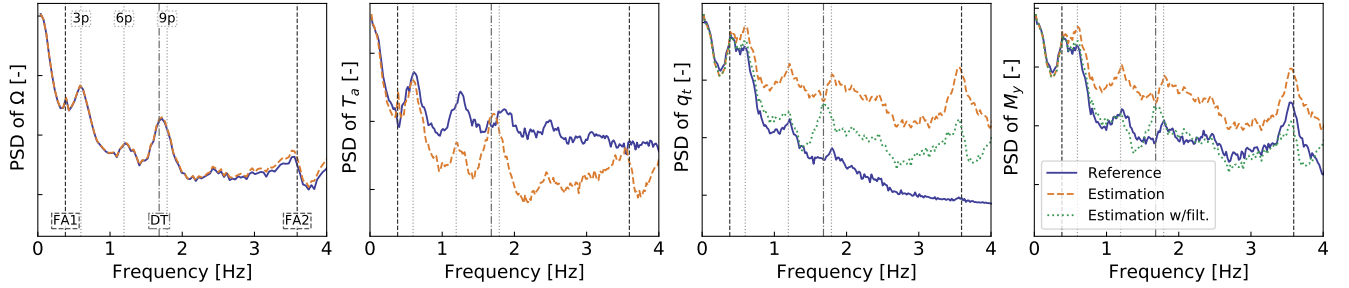

**Figure 7.** Power spectral density (PSD) of signals simulated by OpenFAST and estimated with the KF model for a turbulent simulation at 14 m/s. From left to right: rotational speed, Thrust, TT displacement and TB FA moment. Ticks on the y-axis represent two decades. The main system frequencies are marked with vertical lines: FA modes, drivetrain torsion (DT), and multiple of the rotational frequency  $p = 0.2$ .

2nd mode. A moving average filter of period 1 s was introduced to reduce the high-frequency content of the acceleration. The results are labelled “Estimation w/filt.” on the figure. The analysis of the moment spectrum given on the right of Figure 7 indicates that the frequencies are well captured but the overall content at frequencies beyond the 1st FA mode is too high. This is indicated by the values of the equivalent loads which are respectively 20 MNm and 30 MNm for the reference and estimated  
 340 signal, using a Wöhler slope of  $m = 5$ . The low-pass filter on the acceleration signal greatly improves the spectrum of  $M_y$ . The error in equivalent loads is further ~~quantifies~~ quantified in the next paragraph.

## 4.2 Simulations with noise

The simulations presented in Section 4.1 used as measurements the simulated values from OpenFAST. In this section, a Gaussian noise is added to each of the OpenFAST signals in order to account for measurement uncertainties. The noise level is taken  
 345 a 10% of the standard deviation of the signal simulated by OpenFAST. A noise level of 20% will be referred to as “Large noise”. Simulations were performed with OpenFAST for 10 wind speeds, with six different turbulent seeds for each wind speed. A noise level was applied to these simulation results, prior to feeding them to the KF estimator. Cases with or without applying the low-pass filter on the (noisy) acceleration input were tried. Results for the error in equivalent load and standard deviation of the TB moment are shown in Figure 8. The equivalent loads are estimated using a Wöhler slope of  $m = 5$ . As expected,  
 350 the errors in standard deviation and equivalent loads follow similar trends. Errors without filtering are several fold larger than when the acceleration is filtered. Without noise, the equivalent loads are estimated with  $\pm 8\%$  error. The error increases with the noise level and the equivalent loads appear to be mostly overestimated. Further tuning of the filter and of the covariance matrices involved in the KF may reduce the error. Further discussions are provided in Section 5.

## 4.3 Computational time

355 The framework is written in the noncompiled Python language. The code was run on a single CPU. The average computational time for a 10 min period of measurements at 20 Hz was 37 s. Doubling the frequencies and the number of DOF would still



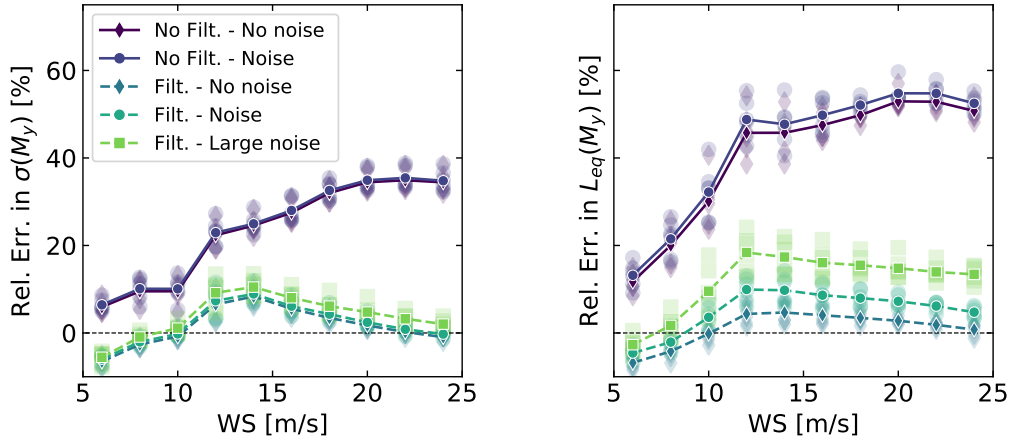

**Figure 8.** Comparison of the equivalent load and standard deviation of the TB moment as obtained by OpenFAST or as estimated from the KF estimator for different noise levels and with or without a filter on the acceleration input. (Left): Error in standard deviation. (Right:) Error in equivalent load. A positive value indicates that the estimator is overestimating. Individual markers indicate a simulation at a given wind speed and turbulence seed number. Lines indicate the mean values.

keep the computational time several fold smaller than real time. The expensive part of the algorithm is the ~~non-linear~~ nonlinear solve needed to find the optimal wind speed (Equation 16).

## 5 Discussion and future work

360 **Measurements** The results presented in the current study remained within the simulation realm. The accuracy of the method under uncertain conditions was partly quantified using various noise ~~models~~ levels. Yet, future work will evaluate the model using field measurement data.

**Model choices** As mentioned in Section 2.3, a certain level of choice is present as to whether the loads are placed as an input or within the state vector. A consequence is that different load models may also be implemented, for instance, models of higher  
365 order than the one used in Equation 8. In the current study, a “random walk” force model was used for the torque, and the thrust was set as a dependent variable of the torque. Yet, these loads are functions of the axial inductions, which typically are assumed to follow a second order model referred to as ~~dynamic-wake~~ “dynamic wake”. A linearization of this model could be applied to the aerodynamic thrust and torque and potentially improve the performance prediction of the Kalman filter.

**Nonlinearities and time-invariance** This study assumed a linear form of the equation of motion and that the system matrices  
370 were time-invariant. Despite this crude assumption, reasonable results were obtained. Yet, further improvement are likely to be obtained if these assumptions are lifted. A simple approach would consist in updating the system matrices at some given interval based on a slow moving average on the wind speed or the tower-top position. A more advanced method would use



filtering methods that are adapted to ~~non-linear~~ nonlinear systems, such as extended Kalman filters or particles filters. This approach would yet greatly increase the computational time. A shortcoming of the current approach is that the linear form of the equation was established “by hand”. A more systematic approach will be considered in the future, using the linearized form of the state matrices returned by OpenFAST, which would include aerodynamic damping directly.

**Degrees of freedom and offshore application** The general formalism presented in Section 2 can be applied to more degrees of freedom than the 2DOF model used: adding more shape function for the tower, and including side-side motion, yaw, tilt, shaft torsion, and blade motions. The results from the 2DOF model appeared encouraging enough to limit ourselves to this set, but future work will consider the inclusion of additional DOF. The extension of the method to offshore application could be done by adding extra degrees of freedom for the substructure, or, by using shape functions that represent the entire support structure. The generalized force due to the wave loading would need to be included. This force may be modelled based on the wind speed, or assumed of the model noise (see Section 2.3).

**Model tuning** Apart from the choices of degrees of freedom and model formulation, there remains a part of model tuning, through: the choice of covariance matrices, and, the potential filtering done on the measurements. As shown in Section 4.2, the filtering of the acceleration was ~~seen~~ observed to greatly improve the performance of the model. A time constant of ~~1.5~~ 1 s was chosen empirically for the filter, but this value may need to be adapted for other applications. The choice of values used for the covariance matrices is usually the main source of criticism for KF based models. Indeed, these values have a strong influence on the results, and they are usually tuned empirically. For the current method to be successfully applied on various wind plants, an automatic tuning procedure is required. In the current study, the covariance matrices of the process were set automatically based on the value of the standard deviation of the simulated signal at rated conditions. For the measurements, these values were divided by two. It was found that this procedure lead to satisfactory results. A sensitivity study should be considered in future work to give further insight on the procedure, in particular if more states and measurements are used.

**Wind speed estimation and standstill/idling condition** The wind speed estimation model presented in Section 2.4 is limited to cases where the turbine is operating. Also, the accuracy of this model is crucial for the determination of the thrust, which in turns determine the tower-top position and the tower loads. The nacelle velocity was for instance omitted in the current study and could be considered in future studies. Wind speed estimation is a field in which the industry has a great expertise. Improvements on the algorithm would benefit the model presented in this ~~paper~~ article.

**Airfoil performance** The performance of the airfoils is a large source of uncertainty which was not addressed. The thrust was determined using tabulated  $C_T$  data, which may be significantly affected by the airfoil performance, which in turn are affected by blade erosion or other roughness sources, and, additional uncertainty on the aerodynamic modelling. Further improvement of the model is thus required to provide an accurate determination of the thrust that would account for such unknowns. Air density should also be considered for a correct account of the loading if a tabulated approach is used.

## 6 Conclusions

405 ~~The paper~~ This article presented a general approach using Kalman filtering to estimate loads on a wind turbine, combining a mechanical model and a set of readily available measurements. An open source framework was established in hope to be further applied for real-time fatigue estimation of wind turbine loads, providing inspiration for a digital twin concept. As an example, the equations for a ~~2DOF~~ 2 DOF system of a wind turbine were presented, and this system was used throughout the article. The study focused on the estimation of tower bending moment and in particular the associated damage equivalent

410 load. Based on simulation results, the estimator was ~~seen~~ observed to be able to capture the damage equivalent loads with an accuracy in the order of 10%. Future work will address the following points: use of field measurements, offshore application of the method, increased number of DOF, automatic covariance tuning, improved wind speed estimation in standstill, improved thrust determination in off-design conditions, and use of a linearized model obtained from an aero-servo-elastic tool.

*Competing interests.* No competing interest are present.

- Auger, F., Hilaiet, M., Guerrero, J. M., Monmasson, E., Orlowska-Kowalska, T., and Katsura, S.: Industrial Applications of the Kalman Filter: A Review, *IEEE Transactions on Industrial Electronics*, 60, 5458–5471, <https://doi.org/10.1109/TIE.2012.2236994>, 2013.
- Belloli, M.: Offshore floating wind turbines as sea state observers, *Journal of Physics: Conference Series*, 2019.
- Bertelè, M., Bottasso, C., and Cacciola, S.: Simultaneous estimation of wind shears and misalignments from rotor loads: formulation for  
420 IPC-controlled wind turbines, *Journal of Physics: Conference Series*, 1037, 032 007, <https://doi.org/10.1088/1742-6596/1037/3/032007>, 2018.
- Bossanyi, E., Savini, B., Iribas, M., Hau, M., Fischer, B., Schlipf, D., van Engelen, T., Rossetti, M., and Carcangiu, C. E.: Advanced controller research for multi-MW wind turbines in the UPWIND project, *Wind Energy*, 15, 119–145, <https://doi.org/10.1002/we.523>, 2012.
- Bossanyi, E. A.: Individual Blade Pitch Control for Load Reduction, *Wind Energy*, 6, 119–128, <https://doi.org/10.1002/we.76>, 2003.
- 425 Bottasso, C. and Croce, A.: Cascading Kalman Observers of Structural Flexible and Wind States for Wind Turbine Control, Tech. rep., Dipartimento di Ingegneria Aerospaziale, Politecnico di Milano, Milano, Italy, Scientific Report DIA-SR 09-02, 2009.
- Bottasso, C., Croce, A., and Riboldi, C.: Spatial estimation of wind states from the aeroelastic response of a wind turbine, in: *The science of making torque from wind*, Heraklion (Crete, Greece), 2010.
- Boukhezzar, B. and Siguerdidjane, H.: Nonlinear Control of a Variable-Speed Wind Turbine Using a Two-Mass Model, *IEEE Transactions*  
430 *on Energy Conversion*, 26, 149–162, <https://doi.org/10.1109/TEC.2010.2090155>, 2011.
- Bozkurt, T. G., Giebel, G., Poulsen, N. K., and Mirzaei, M.: Wind Speed Estimation and Parametrization of Wake Models for Downregulated Offshore Wind Farms within the scope of PossPOW Project, *Journal of Physics: Conference Series*, 524, <https://doi.org/10.1088/1742-6596/524/1/012156>, 2014.
- Branlard, E.: Flexible multibody dynamics using joint coordinates and the Rayleigh-Ritz approximation: The general framework behind and  
435 beyond Flex, *Wind Energy*, 22, 877–893, <https://doi.org/10.1002/we.2327>, 2019a.
- Branlard, E.: YAMS GitHub repository <http://github.com/ebanlard/YAMS/>, 2019b.
- Dimitrov, N., Kelly, M. C., Vignaroli, A., and Berg, J.: From wind to loads: wind turbine site-specific load estimation with surrogate models trained on high-fidelity load databases, *Wind Energy Science*, 3, 767–790, <https://doi.org/10.5194/wes-3-767-2018>, <https://www.wind-energ-sci.net/3/767/2018/>, 2018.
- 440 Eftekhar Azam, S., Chatzi, E., and Papadimitriou, C.: A dual Kalman filter approach for state estimation via output-only acceleration measurements, *Mechanical Systems and Signal Processing*, 60-61, 866 – 886, <https://doi.org/10.1016/j.ymssp.2015.02.001>, 2015.
- Evans, M., Han, T., and Shuchun, Z.: Development and validation of real time load estimator on Goldwind 6 MW wind turbine, *Journal of Physics: Conference Series*, 1037, 032 021, <https://doi.org/10.1088/1742-6596/1037/3/032021>, 2018.
- 445 Grewal, M. S. and Andrews, A. P.: *Kalman Filtering: Theory and Practice Using Matlab*, John Wiley & Sons, Ltd, <https://doi.org/10.1002/9781118984987>, 2014.
- Hafidi, G. and Chauvin, J.: Wind speed estimation for wind turbine control, in: *2012 IEEE International Conference on Control Applications*, pp. 1111–1117, <https://doi.org/10.1109/CCA.2012.6402654>, 2012.
- Hau, M.: Promising load estimation methodologies for wind turbine components, Upwind Deliverable 5.2, Tech. rep., Institut für Solare  
450 Energieversorgungstechnik (ISET), [http://www.upwind.eu/pdf/D5.2\\_PromisingLoadEstimationMethodologies.pdf](http://www.upwind.eu/pdf/D5.2_PromisingLoadEstimationMethodologies.pdf), 2008.

- Iliopoulos, A., Shirzadeh, R., Weijtjens, W., Guillaume, P., Hemelrijck, D. V., and Devriendt, C.: A modal decomposition and expansion approach for prediction of dynamic responses on a monopile offshore wind turbine using a limited number of vibration sensors, *Mechanical Systems and Signal Processing*, 68-69, 84 – 104, <https://doi.org/https://doi.org/10.1016/j.ymssp.2015.07.016>, 2016.
- International Standard IEC, Workgroup 3: IEC 61400-3 Wind turbines : Design requirements for offshore wind turbines, IEC, 2005.
- 455 Jacquelin, E., Bennani, A., and Hamelin, P.: Force reconstruction: analysis and regularization of a deconvolution problem, *Journal of Sound and Vibration*, 265, 81 – 107, [https://doi.org/https://doi.org/10.1016/S0022-460X\(02\)01441-4](https://doi.org/https://doi.org/10.1016/S0022-460X(02)01441-4), 2003.
- Jonkman, J., Butterfield, S., Musial, W., and Scott, G.: Definition of a 5MW Reference Wind Turbine for Offshore System Development, Tech. Rep. NREL/TP-500-38060, National Renewable Energy Laboratory, 2009.
- Knudsen, T., Bak, T., and Soltani, M.: Prediction models for wind speed at turbine locations in a wind farm, *Wind Energy*, 14, 877–894, <https://doi.org/10.1002/we.491>, 2011.
- 460 Lourens, E., Reynders, E., Roeck, G. D., Degrande, G., and Lombaert, G.: An augmented Kalman filter for force identification in structural dynamics, *Mechanical Systems and Signal Processing*, 27, 446–460, 2012.
- Ma, C.-K. and Ho, C.-C.: An inverse method for the estimation of input forces acting on non-linear structural systems, *Journal of Sound and Vibration*, 275, 953 – 971, [https://doi.org/https://doi.org/10.1016/S0022-460X\(03\)00797-1](https://doi.org/https://doi.org/10.1016/S0022-460X(03)00797-1), 2004.
- 465 Mendez Reyes, H., Kanev, S., Doekemeijer, B., and van Wingerden, J.-W.: Validation of a lookup-table approach to modeling turbine fatigue loads in wind farms under active wake control, *Wind Energy Science*, 4, 549–561, <https://doi.org/10.5194/wes-4-549-2019>, <https://www.wind-energ-sci.net/4/549/2019/>, 2019.
- OpenFAST: Open-source wind turbine simulation tool, available at <http://github.com/OpenFAST/OpenFAST/>, 2020.
- Østergaard, K. Z., Brath, P., and Stoustrup, J.: Estimation of effective wind speed, *Journal of Physics: Conference Series*, 75, 012 082, <https://doi.org/10.1088/1742-6596/75/1/012082>, <https://doi.org/10.1088%2F1742-6596%2F75%2F1%2F012082>, 2007.
- 470 Schröder, L., Dimitrov, N. K., Verelst, D. R., and Sørensen, J. A.: Wind turbine site-specific load estimation using artificial neural networks calibrated by means of high-fidelity load simulations, *Journal of Physics: Conference Series*, 1037, 062 027, <https://doi.org/10.1088/1742-6596/1037/6/062027>, 2018.
- Selvam, K., Kanev, S., van Wingerden, J. W., van Engelen, T., and Verhaegen, M.: Feedback–feedforward individual pitch control for wind turbine load reduction, *International Journal of Robust and Nonlinear Control*, 19, 72–91, <https://doi.org/10.1002/rnc.1324>, 2009.
- 475 Simley, E. and Pao, L. Y.: Evaluation of a wind speed estimator for effective hub-height and shear components, *Wind Energy*, 19, 167–184, <https://doi.org/10.1002/we.1817>, 2016.
- Soltani, M. N., Knudsen, T., Svenstrup, M., Wisniewski, R., Brath, P., Ortega, R., and Johnson, K.: Estimation of Rotor Effective Wind Speed: A Comparison, *IEEE Transactions on Control Systems Technology*, 21, 1155–1167, <https://doi.org/10.1109/TCST.2013.2260751>, 2013.
- 480 Song, D., Yang, J., Dong, M., and Joo, Y. H.: Kalman filter-based wind speed estimation for wind turbine control, *International Journal of Control, Automation and Systems*, 15, 1089–1096, <https://doi.org/10.1007/s12555-016-0537-1>, <https://doi.org/10.1007/s12555-016-0537-1>, 2017.
- Zarchan, P. and Musoff, H.: Fundamentals of Kalman filtering : a practical approach, Fourth Edition, AIAA, Progress in astronautics and aeronautics, 2015.
- 485 Ziegler, L., Smolka, U., Cosack, N., and Muskulus, M.: Brief communication: Structural monitoring for lifetime extension of offshore wind monopiles: can strain measurements at one level tell us everything?, *Wind Energy Science*, 2, 469–476, <https://doi.org/10.5194/wes-2-469-2017>, <https://www.wind-energ-sci.net/2/469/2017/>, 2017.
